# Supplementary material for: Growth Modeling for Quantitative, Spatially Resolved Geographic Atrophy Lesion Kinetics
Source: PubMed Central journal article supplement (PMC8237082; doi:10.1167/tvst.10.7.26), 2021-06-22
Supplement: tvst-10-7-26_s002.pdf [file tvst-10-7-26_s002.pdf]

## Supplementary Material II: Computation of Local GA Growth Rates

In this study, we computed local GA growth rates following the approach previously proposed by our group.<sup>1</sup> In this approach, GA growth is treated as an interface propagation problem, wherein the lesion margin expands according to a specified partial differential equation. Specifically, with  $\Omega \subset \mathbb{R}^2$  the image domain, let  $G(t) \subset \Omega$  be the GA area at time  $t$  and  $\partial G(t)$  be its corresponding margin. To accommodate lesion merging (i.e., merging of margin segments of the same lesion focus and/or merging of margin segments of different lesion foci), we utilize the level set method,<sup>2</sup> whereby the GA margin is represented as the zero level set of a higher dimensional function  $\phi$ . In particular,  $G(t) = \{\phi(\mathbf{x}, t) \leq 0\}$  and  $\partial G(t) = \{\phi(\mathbf{x}, t) = 0\}$ , with  $\mathbf{x} \in \Omega$ . The evolution of  $\phi$  is governed by the partial differential equation:

$$\partial_t \phi(\mathbf{x}, t) + F(\phi, \mathbf{x}, t) \|\nabla \phi(\mathbf{x}, t)\| = 0 \quad (1)$$

where  $F$  describes the forces driving GA expansion. In this study we set:

$$F(\phi, \mathbf{x}, t) = \alpha - \beta \kappa(\phi) \quad (2)$$

where  $\alpha$  and  $\beta$  are positive constants and  $\kappa$  is the curvature. The same model parameter values of  $\alpha = 1$  and  $\beta = 0.75$  that were used in our previous study<sup>1</sup> were used in the current study. As described in Moulton et al.,<sup>1</sup> the curvature term causes concave margin segments to expand more rapidly than convex segments. Let  $t_b$  be the time of the baseline visit and  $t_f$  be the time of the follow-up visit. For any given visit pair, we measure  $\partial G(t_b)$  and  $\partial G(t_f)$ , which serve as our boundary conditions. In terms of the level set function, we require:

$$\{\phi(\mathbf{x}, t_b) = 0\} = \partial G(t_b) \quad \text{and} \quad \{\phi(\mathbf{x}, t_f) = 0\} = \partial G(t_f) \quad (3)$$

To satisfy these constraints we define the following signed distance functions:

$$\phi_b(\mathbf{x}) \equiv \begin{cases} -d(\mathbf{x}, \partial G(t_b)) & \text{if } \mathbf{x} \in G(t_b) \\ +d(\mathbf{x}, \partial G(t_b)) & \text{if } \mathbf{x} \in G^c(t_b) \end{cases} \quad \text{and} \quad \phi_f(\mathbf{x}) \equiv \begin{cases} -d(\mathbf{x}, \partial G(t_f)) & \text{if } \mathbf{x} \in G(t_f) \\ +d(\mathbf{x}, \partial G(t_f)) & \text{if } \mathbf{x} \in G^c(t_f) \end{cases} \quad (4)$$

where  $d$  is the Euclidean distance function, and  $G^c$  is the complement of  $G$ . With this, we set the boundary conditions on  $\phi$  as:

$$\phi(\mathbf{x}, t_b) = \phi_b(\mathbf{x}) \quad \text{and} \quad \phi(\mathbf{x}, t_f) = \phi_f(\mathbf{x}) \quad (5)$$

During the evolution of  $\phi$  we ensure that the second condition of Eq. 5 is satisfied by enforcing

$$\phi_f(\mathbf{x}) \leq \phi(\mathbf{x}, t) \quad \forall t \quad (6)$$

after every iteration. Equation 2 was solved numerically using the toolset developed by Mitchell.<sup>3</sup> With

Eq. 2 solved, for each position  $\mathbf{x}_b \in \partial G(t_b)$  we constructed a growth trajectory  $\gamma(\mathbf{x}_b, t)$  via:

$$\frac{d}{dt}\gamma(\mathbf{x}_b, t) = -\partial_t\phi(\mathbf{x}, t) \frac{\nabla\phi(\mathbf{x}, t)}{\|\nabla\phi(\mathbf{x}, t)\|} \quad (7)$$

on the time interval  $t \in [t_b, t_f]$  subject to the initial condition that  $\gamma(\mathbf{x}_b, t_b) = \mathbf{x}_b$ . As in our previous

work, growth trajectories that merged/collided with other growth trajectories were excluded. The local

growth distance,  $\Gamma(\mathbf{x}_b)$ , was computed as:

$$\Gamma(\mathbf{x}_b) = \int_{t_b}^{t_f} \|\dot{\gamma}(\mathbf{x}_b, t)\| dt \quad (8)$$

Finally, the local growth rate associated with position  $\mathbf{x}_b$  was computed by dividing  $\Gamma(\mathbf{x}_b)$  by the inter-

visit time,  $t_f - t_b$ .

1. Moulton EM, Alibhai AY, Lee B, et al. A Framework for Multiscale Quantitation of Relationships Between Choriocapillaris Flow Impairment and Geographic Atrophy Growth. *American Journal of Ophthalmology* 2019.
2. Osher S, Sethian JA. Fronts propagating with curvature-dependent speed: Algorithms based on Hamilton-Jacobi formulations. *Journal of Computational Physics* 1988;79:12-49.
3. Mitchell IM. The Flexible, Extensible and Efficient Toolbox of Level Set Methods. *Journal of Scientific Computing* 2008;35:300-329.
