# Supplementary material for: Growth Modeling for Quantitative, Spatially Resolved Geographic Atrophy Lesion Kinetics
Source: PubMed Central journal article supplement (PMC8237082; doi:10.1167/tvst.10.7.26), 2021-06-22
Supplement: tvst-10-7-26_s004.pdf [file tvst-10-7-26_s004.pdf]

#### Supplementary Material IV: Spatial Variations in the Number of Eyes and Margin Points

As a measure of the number of eyes that contribute to a conditional mean geographic atrophy (GA) growth rate estimate, we computed:

$$N_{e|x}(x) = \frac{\sum_{i=1}^{n_e} K_h \left( \min_{x_j \in X^{(i)}} \|x_j - x\| \right)}{K_h \left( \min_i \min_{x_j \in X^{(i)}} \|x_j - x\| \right)} \quad (1)$$

where  $x$  is the covariate of interest (i.e., margin eccentricity,  $x = r$ ; margin angle,  $x = \theta$ ; or growth angle,  $x = \psi$ ),  $N_{e|x}$  is the number of eyes contributing to the growth rate measurement conditioned on  $x$ ,  $n_e$  is the number of eyes in the study (in our study  $n_e = 38$ ),  $X^{(i)}$  is the set of covariate values from the  $i$ -th eye ( $X^{(i)} = R^{(i)}$ ,  $X^{(i)} = \Theta^{(i)}$ , or  $X^{(i)} = \Psi^{(i)}$ ), and  $\|\cdot\|$  and  $K_h$  are the distance function and Gaussian kernel defined in *Supplementary Material III*. The bandwidths  $h$  were matched to those specified in *Supplementary Material III*.

As a measure of the number of margin points contributing to a conditional mean GA growth rate estimate, we computed:

$$N_{p|x}(x) = \frac{\sum_{i=1}^{n_p} K_h(\|x_i - x\|)}{K_h \left( \min_i \|x_i - x\| \right)} \quad (2)$$

where  $x$  is the covariate of interest,  $N_{p|x}$  is the number of margin points contributing to the growth rate measurement conditioned on  $x$ ,  $n_p$  is the number of margin points included in the analysis (in this study  $n_p = 88,356$ ), and  $\|\cdot\|$  and  $K_h$  are the distance function and Gaussian kernel defined in *Supplementary Material III*. Again, the bandwidths  $h$  were matched to those specified in *Supplementary Material III*.
